# Supplementary material for: Compositional Lotka-Volterra describes microbial dynamics in the simplex
Source: PubMed Central journal article supplement (PMC7325845; doi:10.1371/journal.pcbi.1007917), 2020-05-29
Supplement: pcbi.1007917.s001.pdf [file pcbi.1007917.s001.pdf]

# Appendix to Compositional Lotka-Volterra describes microbial dynamics in the simplex

Tyler A. Joseph<sup>1</sup>, Liat Shenhav<sup>2</sup>, Joao B. Xavier<sup>3</sup>, Eran Halperin<sup>2,4,5</sup>, Itsik Pe'er<sup>1,6,7\*</sup>

**1** Department of Computer Science, Columbia University, New York, NY, USA

**2** Department of Computer Science, UCLA, Los Angeles, CA, USA

**3** Memorial Sloan Kettering Cancer Center, New York NY, USA

**4** Department of Human Genetics, University of California Los Angeles, Los Angeles, CA, USA

**5** Department of Anesthesiology and Perioperative Medicine, University of California Los Angeles, Los Angeles, CA, USA

**6** Department of Systems Biology, Columbia University, New York, NY, USA

**7** Data Science Institute, Columbia University, New York, NY, USA

\* itsik@cs.columbia.edu

## Appendix A: Changing the denominator of the additive log-ratio transformation

Given parameters with respect to one choice of denominator of the additive log-ratio, say  $\pi_D(t)$ , we can obtain parameters for any other choice of denominator. For instance, if we are interested in the relationship between species  $i$  and  $j$ , we can express how their log ratio changes over time as follows:

$$\frac{d}{dt} \log \left( \frac{\pi_i(t)}{\pi_j(t)} \right) = \frac{d}{dt} \log \left( \frac{\pi_i(t)}{\pi_D(t)} \right) - \frac{d}{dt} \log \left( \frac{\pi_j(t)}{\pi_D(t)} \right) \quad (1)$$

$$= (g_i - g_j) + \sum_{k=1}^D (A_{ik} - A_{jk}) \pi_k(t) + \sum_{p=1}^P (B_{ip} - B_{jp}) u_p(t) \quad (2)$$

## Appendix B: Solving for $\frac{d}{dt} \pi_i(t)$

We can also express cLV as a dynamical system in terms of derivatives with respect to relative abundances  $\frac{d}{dt} \pi_i$  for  $i = 1, \dots, D$ . First, note

$$\pi_D = 1 - \sum_{j=1}^{D-1} \pi_j \quad (3)$$

$$\implies \frac{d}{dt} \pi_D = - \sum_{j=1}^{D-1} \frac{d}{dt} \pi_j \quad (4)$$

where the  $\pi_i$  are implicit functions of  $t$ . Next, using  $\frac{d}{dt} \log \pi_i = \frac{\frac{d}{dt} \pi_i}{\pi_i}$  we have

$$\frac{d}{dt} \log \left( \frac{\pi_i}{\pi_D} \right) = \frac{d}{dt} \log \pi_i - \frac{d}{dt} \log \pi_D \quad (5)$$

$$= \frac{\frac{d}{dt} \pi_i}{\pi_i} - \frac{\frac{d}{dt} \pi_D}{\pi_D} \quad (6)$$

$$= \frac{\frac{d}{dt} \pi_i}{\pi_i} - \frac{\frac{d}{dt} (1 - \sum_j \pi_j)}{\pi_D} \quad (7)$$

$$= \frac{\frac{d}{dt} \pi_i}{\pi_i} + \sum_j \frac{\frac{d}{dt} \pi_j}{\pi_D} \quad (8)$$

$$= \frac{d}{dt} \pi_i \left( \frac{1}{\pi_i} \right) + \sum_{j=1}^{D-1} \frac{d}{dt} \pi_j \left( \frac{1}{\pi_D} \right) \quad (9)$$

This allows us to write the derivatives  $\frac{d}{dt} \pi_i$  as the solution to the following system of equations.

$$\left( \begin{bmatrix} \frac{1}{\pi_1} & 0 & \cdots & 0 \\ 0 & \frac{1}{\pi_2} & \cdots & 0 \\ \vdots & \vdots & \ddots & \vdots \\ 0 & 0 & \cdots & \frac{1}{\pi_{D-1}} \end{bmatrix} + \frac{1}{\pi_D} \begin{bmatrix} 1 & 1 & \cdots & 1 \\ 1 & 1 & \cdots & 1 \\ \vdots & \vdots & \ddots & \vdots \\ 1 & 1 & \cdots & 1 \end{bmatrix} \right) \begin{bmatrix} \frac{d}{dt} \pi_1 \\ \frac{d}{dt} \pi_2 \\ \vdots \\ \frac{d}{dt} \pi_{D-1} \end{bmatrix} = \begin{bmatrix} \frac{d}{dt} \log \left( \frac{\pi_1}{\pi_D} \right) \\ \frac{d}{dt} \log \left( \frac{\pi_2}{\pi_D} \right) \\ \vdots \\ \frac{d}{dt} \log \left( \frac{\pi_{D-1}}{\pi_D} \right) \end{bmatrix} \quad (10)$$

This system has the following solution

$$\begin{bmatrix} \frac{d}{dt}\pi_1 \\ \frac{d}{dt}\pi_2 \\ \vdots \\ \frac{d}{dt}\pi_{D-1} \end{bmatrix} = \left( \text{diag} \left[ \frac{1}{\pi_1}, \dots, \frac{1}{\pi_{D-1}} \right] + \frac{1}{\pi_D} \mathbf{1}_{D-1} \mathbf{1}_{D-1}^T \right)^{-1} \begin{bmatrix} \frac{d}{dt} \log \left( \frac{\pi_1}{\pi_D} \right) \\ \frac{d}{dt} \log \left( \frac{\pi_2}{\pi_D} \right) \\ \vdots \\ \frac{d}{dt} \log \left( \frac{\pi_{D-1}}{\pi_D} \right) \end{bmatrix} \quad (11)$$

where we have written the two matrices of the previous equation with a more suggestive form. Applying the Sherman-Morrison formula allows us to write the inverse in closed form.

$$\left( \text{diag} \left[ \frac{1}{\pi_1}, \dots, \frac{1}{\pi_{D-1}} \right] + \frac{1}{\pi_D} \mathbf{1}_{D-1} \mathbf{1}_{D-1}^T \right)^{-1} = \text{diag} [\pi_1, \dots, \pi_{D-1}] - \begin{bmatrix} \pi_1 \\ \pi_2 \\ \vdots \\ \pi_{D-1} \end{bmatrix} \begin{bmatrix} \pi_1 \\ \pi_2 \\ \vdots \\ \pi_{D-1} \end{bmatrix}^T \quad (12)$$

Plugging in the terms for  $\frac{d}{dt} \log \left( \frac{\pi_i}{\pi_D} \right)$  leaves us with the following form for  $\frac{d}{dt} \pi_i$

$$\frac{d}{dt} \pi_i = \pi_i \left( \bar{g}_i + \sum_{j=1}^D \bar{A}_{ij} \pi_j + \sum_{p=1}^P \bar{B}_{ip} u_p \right) - \pi_i \left[ \sum_{k=1}^{D-1} \pi_k \left( \bar{g}_k + \sum_{j=1}^D \bar{A}_{kj} \pi_j + \sum_{p=1}^P \bar{B}_{kp} u_p \right) \right] \quad (13)$$

$$\frac{d}{dt} \pi_D = -\pi_D \left[ \sum_{k=1}^{D-1} \pi_k \left( \bar{g}_k + \sum_{j=1}^D \bar{A}_{kj} \pi_j + \sum_{p=1}^P \bar{B}_{kp} u_p \right) \right] \quad (14)$$

## Appendix C: Compositional Lotka-Volterra under the isometric log-ratio transformation

We noted in the main text that we could define a compositional version of gLV under other compositional data transformations. Here, we demonstrate a dynamical system based on the isometric log-ratio transformation (ilr). First, we define column vector

$$\text{alr}(\pi(t)) = \begin{bmatrix} \frac{\pi_1(t)}{\pi_D(t)} & \dots & \frac{\pi_{D-1}(t)}{\pi_D(t)} \end{bmatrix}^T \quad (15)$$

Egozcue et al. (2003) show that the additive log-ratio transformation can be expressed as a linear transformation of the ilr transformation.

$$\text{alr}(\pi(t)) = F^T U^T \text{ilr}(\pi(t)) \quad (16)$$

where

$$U^T = \begin{bmatrix} \uparrow & \dots & \uparrow \\ u_1 & \dots & u_{D-1} \\ \downarrow & \dots & \downarrow \end{bmatrix} \in \mathbb{R}^{D \times (D-1)} \text{ with } u_i^T u_j = \delta_{ij} \quad (17)$$

$$F^T = [I_{D-1} \quad -\mathbf{1}_{D-1}] \in \mathbb{R}^{(D-1) \times D}. \quad (18)$$

Here we use  $F^T$  and  $U^T$  since Egozcue et al. (2003) use row vectors instead of column vectors—the transpose ensures consistency between the different notations. The vectors  $u_i$  arise from a choice of basis,  $e_i \in \mathcal{S}^D$ , in the simplex under the Aitchison geometry that defines the isometric log-ratio transformation. If we substitute the alr for an equivalent representation of the ilr, we get a new system

$$\frac{d}{dt} \text{alr}(\pi(t)) = \bar{g} + \bar{A}\pi(t) + \bar{B}u(t) = F^T U^T \frac{d}{dt} \text{ilr}(\pi(t)) \quad (19)$$

Note that  $F^T U^T \in \mathbb{R}^{(D-1) \times (D-1)}$  is invertible. Again following Egozcue et al. (2003), define the Moore-Penrose generalized inverse of  $F$

$$H = \frac{1}{D} \begin{bmatrix} D-1 & -1 & -1 & \cdots & -1 & -1 \\ -1 & D-1 & -1 & \cdots & -1 & -1 \\ \vdots & \vdots & \vdots & \ddots & \vdots & \vdots \\ -1 & -1 & D-1 & \cdots & D-1 & -1 \end{bmatrix} \in \mathbb{R}^{(D-1) \times D} \quad (20)$$

Then  $FH = I_{D-1}$ , and  $(UF)(HU^T) = UI_{D-1}U^T = UU^T = I_{D-1}$ , which implies  $(UF)^{-1} = HU^T$ . Hence  $(F^T U^T)^{-1} = (UF)^{-T} = (HU^T)^T = UH^T$ . This gives us

$$\frac{d}{dt} \text{ilr}(\pi(t)) = UH^T \bar{g} + UH^T \bar{A} \pi(t) + UH^T \bar{B} u(t) \quad (21)$$

$$:= g_{\text{ilr}} + A_{\text{ilr}} \pi(t) + B_{\text{ilr}} u(t) \quad (22)$$

Given  $g_{\text{ilr}}$ ,  $A_{\text{ilr}}$ , and  $B_{\text{ilr}}$ , we can directly solve for the relative parameters  $\bar{g}$ ,  $\bar{A}$ , and  $\bar{B}$  which correspond to the relative parameters of gLV.

$$\bar{g} = F^T U^T g_{\text{ilr}} \quad (23)$$

$$\bar{A} = F^T U^T A_{\text{ilr}} \quad (24)$$

$$\bar{B} = F^T U^T B_{\text{ilr}}. \quad (25)$$

## References

J. J. Egozcue, V. Pawlowsky-Glahn, G. Mateu-Figueras, and C. Barcelo-Vidal. Isometric logratio transformations for compositional data analysis. *Mathematical Geology*, 35(3):279–300, 2003.
